# Supplementary material
Source: PubMed Central journal article supplement (PMC9012077)
Supplement: NIHMS1794907-supplement-1.pdf [file NIHMS1794907-supplement-1.pdf]

## ONLINE REPOSITORY

## MATERIALS AND METHODS

## Reagents

For *in vitro* experiments on murine humanized bone marrow–derived mast cells (MCs), chimeric humanized anti-NP IgE (cIgE) (MCA333S clone JW8/1 Serotec BioRad, Hercules, Calif) and its hapten-specific antigen NP-HSA/bovine serum albumin (BSA) (N-50051 and N-5050L; Biosearch Technologies, Petaluma, Calif) were used at different concentrations (0.5  $\mu$ g and 0.01–100 ng, respectively). Human serum (up to 10%) from an allergic donor containing IgE against methotrexate (in 200  $\mu$ L) followed by  $\alpha$ -hIgE challenge (Goat anti-Human IgE-Affinity Purified; Immunology Consultants Laboratory, Inc., Portland, Ore) was assessed to find the antigen target dose (0.5  $\mu$ g, experiment not shown). To optimize the system, MCs were also sensitized using different percentages of patients' serum and then challenged with the same antigen doses to find the optimal serum dose (5%) to sensitize the cells (the dose that produces the higher  $\beta$ -hexosaminidase release during challenge). BSA (10 ng) or Razin Medium was used as a control.

## Cells and culture conditions

For the generation of MCs, femurs of hFc $\epsilon$ RI $\alpha$ <sup>+</sup>/mFc $\epsilon$ RI $\alpha$ <sup>-/-</sup> and mFc $\epsilon$ RI $\alpha$ <sup>-/-</sup> (MuKO) mice were flushed and progenitor cells were cultured as described<sup>E1</sup> in RPMI medium supplemented with 10% fetal bovine serum (Gibco, Thermo Fisher Scientific, Waltham, Mass), 10,000 U/mL Pen-Strep (Gibco), 2 mM L-glutamine, 50  $\mu$ M  $\beta$ -mercaptoethanol (Gibco), 10 ng/mL recombinant murine IL-3, and stem cell factor (PeproTech, Rocky Hill, NJ).

Fc $\epsilon$ RI cross-linking, sFc $\epsilon$ RI production, and  $\beta$ -hexosaminidase release assay

MCs ( $1 \times 10^6$  cells in 1 mL per condition) cultured in Razin Medium were loaded overnight with cIgE (0.5  $\mu$ g/mL) or with medium (in 200  $\mu$ L) containing up to 10% serum from patients who were allergic to methotrexate. MCs were stimulated either with single or sequential doses of 4-hydroxy-3-nitrophenylacetyl bovine serum albumin (NP-BSA) (0.01–100 ng/mL) or anti-hIgE (0.5  $\mu$ g) for 10 or 110 minutes. Desensitization (DS) was performed as previously described<sup>E2,E3</sup> and is outlined in Figure 2.

Culture supernatants were collected and analyzed by the enzyme-linked immunosorbent assay for sFc $\epsilon$ RI and  $\beta$ -hexosaminidase levels as previously described.<sup>E2,E4,E5</sup>

*In vitro* DS on humanized bone marrow–derived MCs

MCs and MuKO cells were harvested and cultured as described, and activation or DS was performed. *In vitro* DS protocols were used as previously described.<sup>E2,E3</sup> Briefly, cells were loaded overnight with cIgE (0.5  $\mu$ g/mL) or with medium (in 200  $\mu$ L) containing up to 10% serum from a patient allergic to methotrexate. Cells were stimulated either with single or sequential doses of NP-BSA (0.01–100 ng/mL) or anti-hIgE (0.5  $\mu$ g) for 10 or 110 minutes, as outlined in Figure 2, A, and Figure E3 (available in this article's Online Repository at [www.jaci-inpractice.org](http://www.jaci-inpractice.org)).

## Mice

Mice were all housed in specific pathogen-free conditions according to the National Institutes of Health, and all experiments were performed with cohoused and littermate controlled cohorts that contained both genders. All animal studies were approved by the Boston Children's Hospital Institutional Animal Care and Use Committee.

## Patient information

Patients with cancer who experienced a hypersensitivity reaction to carboplatin or oxaliplatin were recruited, and serum was collected for sFc $\epsilon$ RI, IgE, and tryptase detection. Allergic patients were defined by >3 mm wheal size in skin test (ST)<sup>E6-E9</sup> with the culprit drug and any hypersensitivity IgE-mediated/mast cell activation–related symptoms<sup>E6,E8-E14</sup> during platin infusion (first reaction) from cutaneous to even anaphylaxis. The initial reaction was graded following Brown's classification in: mild/grade 1 (1 symptomatic organ system), moderate/grade 2 (2 or more systems involved), and severe/grade 3 (more than 2 systems affected and/or vital sign changes). The presence of other adverse drug reactions was reported by the patients.

Serum used in humanized bone-marrow derived mast cell sensitization was collected from a 70-year-old man with lymphoma. He presented with an immediate reaction during the 15th life time exposure to methotrexate with positive ST.

Control atopic patients were recruited and serum was collected for sFc $\epsilon$ RI and IgE detection. Inclusion criteria were no history of cancer and allergen-specific IgE levels >0.35 kU<sub>A</sub>/L to 1 or more allergens.

A total of 14 patients with cancer and 12 atopic controls were used in the analysis. All patients included in the study gave written informed consent and were recruited after approved application from the Research Consent Form for Biomedical Research–Dana-Farber/Harvard Cancer Center–BIDMC/BCH/BWH/DFCI/MGH/Partners Network Affiliates (DFCI Protocol Number: 13-288) or the Ethics Commission, Medical University of Vienna (EK Nr: 079/2009). Patients were followed up and their clinical history during further DS protocols was analyzed.

## Serum sample collection

Blood samples were collected on the day of DS before and at the end of the procedure. A yellow cap BD Vacutainer SST II Advance tube was used to obtain and separate the serum sample (the tubes contain silica to activate clotting of the specimen and a gel that forms a barrier between the clot and the serum after centrifugation). After forming a clot (30 minutes), tubes were centrifuged at 1300 to 2000 g for 10 minutes at 25°C. Next, serum was collected and stored at –80°C. Serum samples from controls were collected and processed as described.

## Drug DS in patients with cancer

Patients with cancer allergic to oxaliplatin or carboplatin entered a drug DS protocol, as previously described and shown in Figure E3. DS protocols with 16 to 12 steps, escalating the dose 2 to 2.5 times every 15 minutes, were applied.<sup>E6,E8-E14</sup> The initial concentration of the solution in a 4 bags/16 steps protocol was 1/1000, and 1/100 was the first bag concentration in a 3

bags/12 steps protocol, reaching the target dose at the end of the procedure.<sup>E6</sup> All patients received standard premedication. Omalizumab (anti-IgE therapy) was used in patient 1, who was highly sensitized and experienced severe reactions during previous DS (Table E1). At the time of serum collection, patients 1 and 6 experienced an IgE-mediated reaction grade 1 during DS. During further DS, patients 1, 6, and 8 experienced IgE-mediated reactions with different grades at the referred DS number (Table E2). Patient 14 experienced a cytokine release reaction grade 2 at DS 13, 14, 15, and 16. All DS were completed until the patients received the treatment target dose for their oncologic disease, or until the patient deceased, changed treatment, or other reason (Table E2).

### Statistical analyses

All statistical analyses were performed using Prism 7 (GraphPad Software), and results are shown as mean  $\pm$  standard error of the mean of the indicated number of individual data points or independent experiments. Correlations were calculated by the Pearson rank correlation test and correlation coefficients are displayed as “*r*.” Statistical analysis was performed using an unpaired or a paired *t*-test for comparison between 2 groups, a 1-way analysis of variance (ANOVA) test plus Tukey’s multiple correction for more than 2 unmatched groups and a 2-way ANOVA test plus Tukey’s multiple correction for multiple comparisons between 3 or more groups. A *P* value  $\leq .05$  was considered significant.

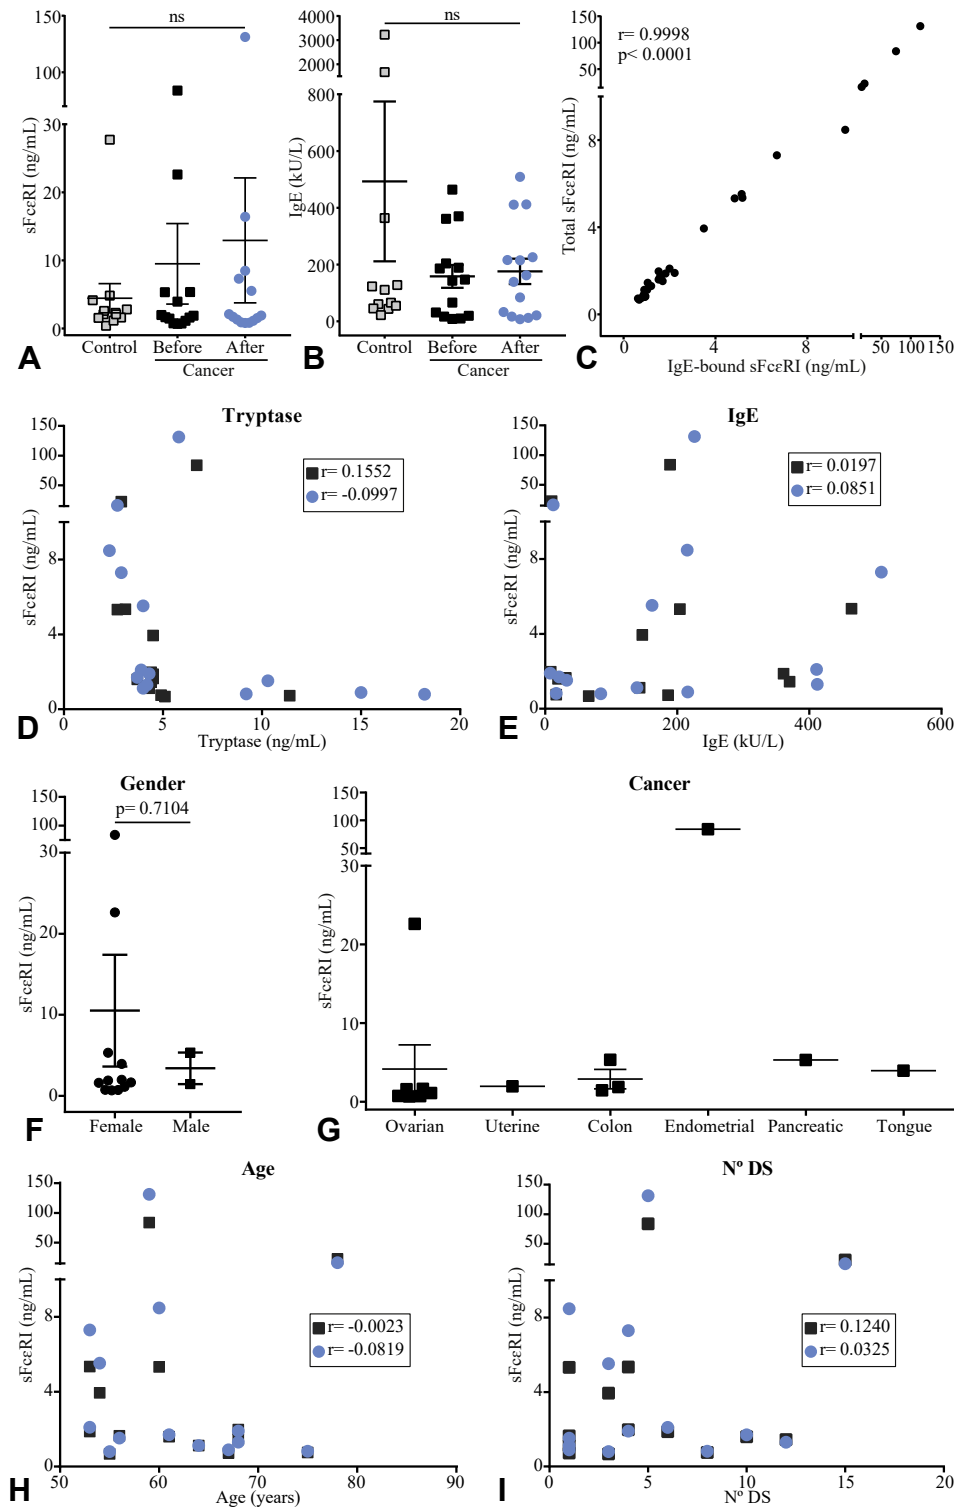

**FIGURE E1.** Levels of sFceRI in controls and drug-allergic patients with cancer. Comparison of sFceRI or IgE levels in control and patients with cancer (A, B). Correlation between total and IgE-bound sFceRI levels (C), tryptase levels (D), total IgE levels (E), gender (F), cancer type (G), age (H), and number of DS (I) in patients with cancer before (black squares) and after (blue circles) DS. An unpaired *t*-test or a 1-way ANOVA test plus Tukey's multiple correction, or Pearson *r* correlation analysis was performed. ANOVA, Analysis of variance; DS, desensitization; ns, not significant; sFceRI, soluble FceRI.

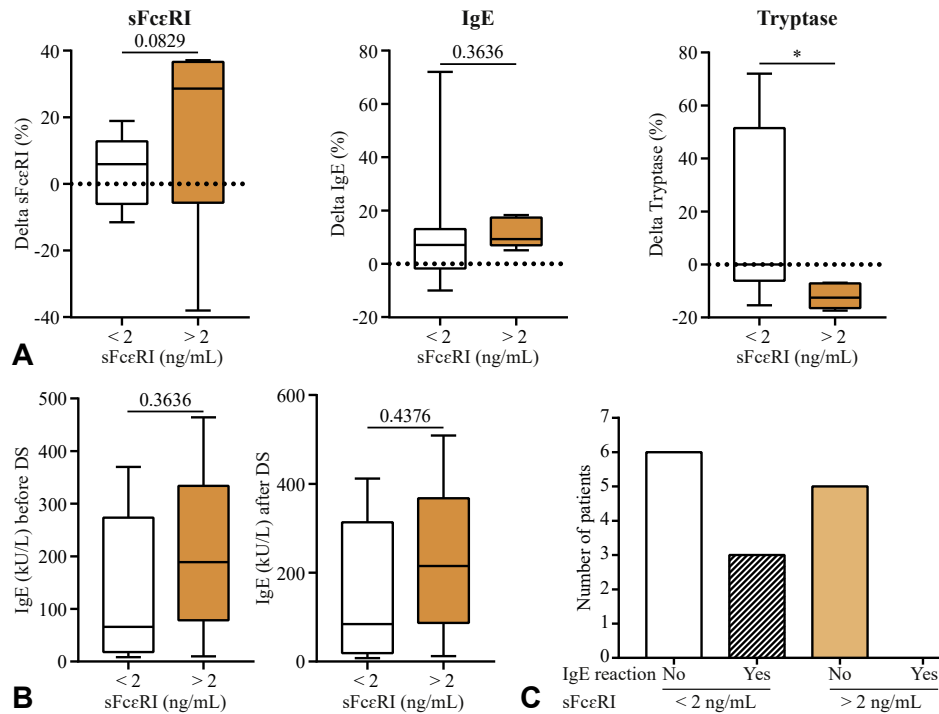

**FIGURE E2.** Modulation of sFceRI, IgE, and tryptase levels by DS. Difference of sFceRI, IgE, and tryptase levels between before and after DS represented as percentage (**A**). Total IgE levels before and after DS (**B**). Patients ( $n = 5$ ) with sFceRI levels  $>2$  ng/mL (white bar) and patients ( $n = 9$ ) with sFceRI levels  $<2$  ng/mL (orange bar) are represented as box and whisker graphs (minimum to maximum). Number of patients to suffer an IgE-mediated reaction during further DS (**C**). A Mann-Whitney test was performed, where  $*P < .05$ . DS, Desensitization; sFceRI, soluble FceRI.

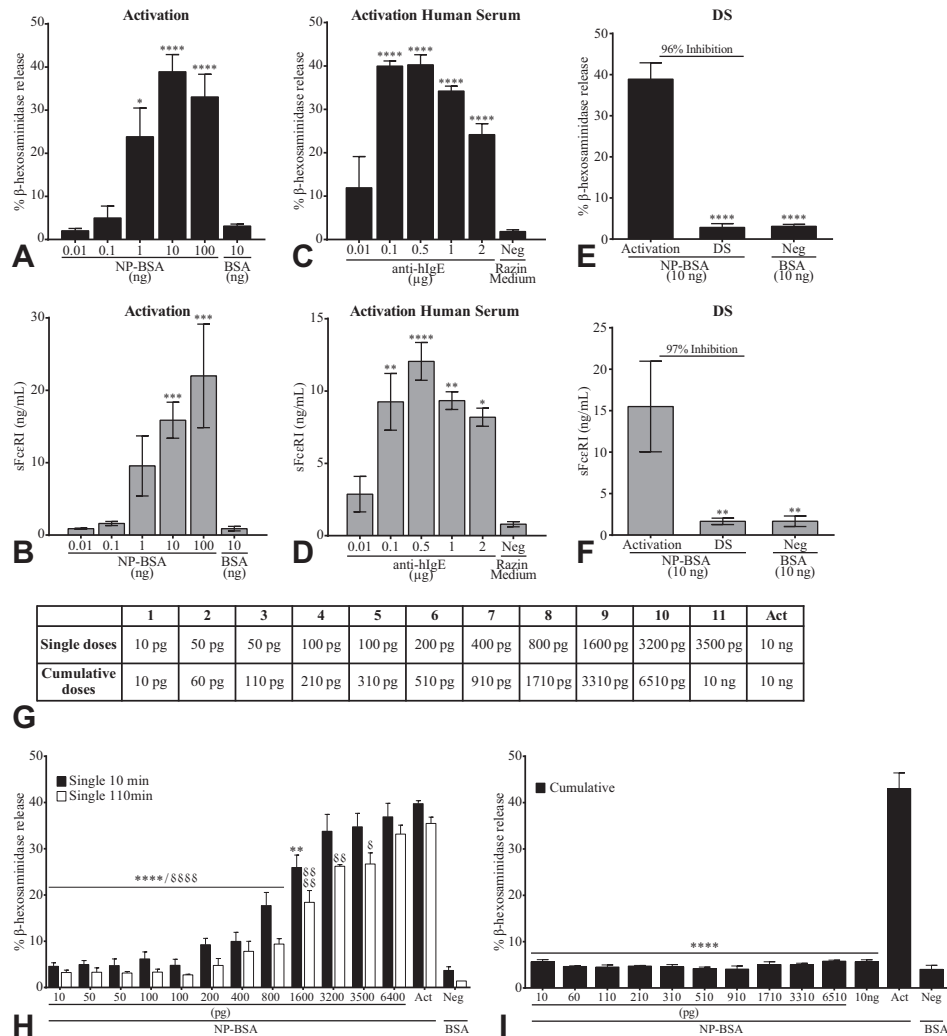

**FIGURE E3.** Activation of MCs triggers release of sFc $\epsilon$ RI that is inhibited by cumulative doses. A total of  $1 \times 10^6$ /mL MCs were loaded overnight with 0.5  $\mu$ g/mL anti-NP clgE (**A**, **B**) or up to 10% allergic human serum in 200  $\mu$ L (**C**, **D**) followed by a single challenge with 100-0.1 ng/mL NP-BSA (**A**, **B**) or 2-0.01  $\mu$ g/mL anti-hIgE (**C**, **D**). A total of  $1 \times 10^6$ /mL MCs or MuKO (mFc $\epsilon$ RI $\alpha^{-/-}$ ) cells were loaded overnight with 0.5  $\mu$ g/mL anti-NP clgE (**E**, **F**) followed by DS with 10 ng/mL NP-BSA. Percentage of  $\beta$ -hexosaminidase release (**A**, **C**, **E**) and total sFc $\epsilon$ RI levels (**B**, **D**, **F**) were measured. Layout of antigen doses for single and cumulative experiments (**G**). A total of  $1 \times 10^6$ /mL MCs were loaded overnight with 0.5  $\mu$ g/mL anti-NP clgE (**H**, **I**) followed by a single-dose challenge or cumulative doses (10 pg/mL to 10 ng/mL NP-BSA) for 10 or 110 minutes. A single challenge with 10 ng/mL NP-BSA (Act), 10 ng/mL BSA (Neg), or Razin Medium was used as a control. Data represent mean  $\pm$  SEM of  $n = 3-8$  independent experiments. A 1-way ANOVA test plus Tukey's multiple correction was performed, where  $*/\delta P < .05$ ,  $**/\delta\delta P < .01$ ,  $***P < .001$ , and  $****/\delta\delta\delta\delta P < .0001$  compared with controls. \*Represents statistics between conditions among black bars (**H**) and cumulative (**I**) data sets.  $\delta$ Represents statistics between conditions among white bars (**H**). ANOVA, Analysis of variance; DS, desensitization; MC, mast cell; nd, not detected; NP-BSA, 4-hydroxy-3-nitrophenylacetyl bovine serum albumin; SEM, standard error of the mean; sFc $\epsilon$ RI, soluble Fc $\epsilon$ RI.

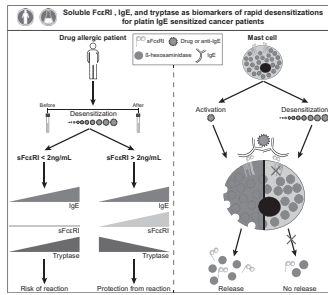

**FIGURE E4.** Soluble Fc $\epsilon$ RI can be used as a biomarker during *in vivo* desensitization protocols to identify patients at risk or under protection from reactions, together with serum IgE and tryptase levels. *In vitro* desensitization protocols on mast cells showed that  $\beta$ -hexosaminidase and soluble Fc $\epsilon$ RI release were inhibited on cumulative doses of antigen. *sFc $\epsilon$ RI*, Soluble Fc $\epsilon$ RI.

**TABLE E1.** Clinical and serological characteristics of patients with cancer

| Patient | Age (y) | Gender | IgE disease | ADR | Cancer type | Drug | Infusion at which reaction occurred | Grade of 1st reaction | ST | No. of DS | Reaction during DS | sFceRI (ng/mL) |        |        | IgE (kU/L) |        |       | Tryptase (ng/mL) |        |        |
|---------|---------|--------|-------------|-----|-------------|------|-------------------------------------|-----------------------|----|-----------|--------------------|----------------|--------|--------|------------|--------|-------|------------------|--------|--------|
|         |         |        |             |     |             |      |                                     |                       |    |           |                    | Before         | After  | Delta  | Before     | After  | Delta | Before           | After  | Delta  |
| 1       | 55      | F      | —           | Yes | Ovarian     | C    | 8                                   | 2                     | +  | 3         | Y (1)*             | 0.68           | 0.80   | 15%    | 66.00      | 84.20  | 21.6% | 5.10             | 18.20† | 72%    |
| 2       | 75      | F      | AA+AR       | Yes | Ovarian     | C    | 12                                  | 1                     | +  | 8         | —                  | 0.75           | 0.83   | 9.6%   | 16.80      | 16.70  | −0.6% | 4.90             | 9.20†  | 46.7%  |
| 3       | 68      | F      | AR          | Yes | Uterine     | C    | 16                                  | 3                     | +  | 4         | —                  | 1.98           | 1.90   | −4.2%  | 8.33       | 7.57   | −10%  | 4.40             | 4.30   | −2.3%  |
| 4       | 64      | F      | —           | —   | Ovarian     | C    | 7                                   | 2                     | +  | 1         | —                  | 1.13           | 1.13   | 0%     | 143.00     | 139.00 | −2.9% | 4.30             | 4.00   | −7.5%  |
| 5       | 61      | F      | —           | Yes | Ovarian     | C    | 9                                   | 1                     | +  | 10        | —                  | 1.60           | 1.70   | 5.9%   | 19.50      | 21.00  | 7.1%  | 3.70             | 3.70   | 0%     |
| 6       | 67      | F      | —           | Yes | Ovarian     | C    | 9                                   | 3                     | +  | 1         | Y (1)*             | 0.73           | 0.90   | 18.9%  | 186.00     | 216.00 | 13.9% | 11.40            | 15.00† | 24%    |
| 7       | 53      | F      | —           | Yes | Colon       | O    | 10                                  | 2                     | +  | 6         | —                  | 1.88           | 2.10   | 10.5%  | 361.00     | 411.00 | 12.2% | 4.50             | 3.90   | −15.4% |
| 8       | 56      | F      | CD          | —   | Ovarian     | C    | 13                                  | 2                     | +  | 1         | —                  | 1.65           | 1.53   | −7.8%  | 31.20      | 32.60  | 4.3%  | 4.50             | 10.30† | 56.3%  |
| 9‡      | 78      | F      | AC+CD       | —   | Ovarian     | C    | 28                                  | 1                     | +  | 15        | —                  | 22.63          | 16.40  | −38%   | 9.88       | 12.10  | 18.3% | 2.90             | 2.70   | −7.4%  |
| 10‡     | 59      | F      | —           | —   | Endometrial | C    | 9                                   | 3                     | +  | 5         | —                  | 83.90          | 131.25 | 36.1%  | 189.00     | 226.00 | 16.4% | 6.70             | 5.80   | −15.5% |
| 11‡     | 53      | M      | —           | —   | Colon       | O    | 7                                   | 1                     | +  | 4         | —                  | 5.35           | 7.30   | 26.7%  | 464.00     | 509.00 | 8.8%  | 3.10             | 2.90   | −6.9%  |
| 12      | 68      | M      | —           | —   | Colon       | O    | 12                                  | 3                     | +  | 12        | —                  | 1.45           | 1.30   | −11.5% | 370.00     | 412.00 | 10.2% | 4.40             | 4.20   | −4.8%  |
| 13‡     | 60      | F      | FA          | Yes | Pancreatic  | O    | 7                                   | 2                     | +  | 1         | —                  | 5.33           | 8.47   | 37.1%  | 204.00     | 215.00 | 5.1%  | 2.70             | 2.30   | −17.4% |
| 14‡     | 54      | F      | AR          | —   | Tongue      | C    | 10                                  | 3                     | +  | 3         | —                  | 3.94           | 5.52   | 28.6%  | 147.00     | 162.00 | 9.3%  | 4.50             | 4.00   | −12.5% |
| Mean †  |         |        |             |     |             |      |                                     |                       |    |           |                    |                |        | 19.6%  |            |        | 11.6% |                  |        | 49.8%  |
| Mean    |         |        |             |     |             |      |                                     |                       |    |           |                    | 9.50           | 12.94  | 9.1%   | 158.3      | 176.0  | 8.1%  | 4.8              | 3.8    | 7.8%   |
| SD      |         |        |             |     |             |      |                                     |                       |    |           |                    | 21.30          | 33.1   | 19.9%  | 144.4      | 160.9  | 8.3%  | 2.1              | 0.9    | 28.5%  |

AA, Allergic asthma; AC, allergic conjunctivitis; ADR, adverse drug reaction; AR, allergic rhinitis; C, carboplatin; CD, contact dermatitis; DS, desensitization; FA, food allergy; O, oxaliplatin; SD, standard deviation; sFceRI, soluble FceRI; ST, skin test.

\*Patients 1 and 6 experienced a mild (grade 1) reaction during DS. Patient 1 had received omalizumab as DS premedication. Values of total sFceRI, total IgE, and tryptase from serum samples taken before and after DS.

†Tryptase levels greater than 11.5 ng/mL or greater than 1.2 times baseline + 2 ng/mL are considered elevated.

‡Patients with sFceRI above 2 ng/mL.

**TABLE E2.** Clinical and serological characteristics of control group

| Patient | Age (y) | Gender | Disease                      | Relevant allergen | sFceRI (ng/mL) | IgE (kU/L) |
|---------|---------|--------|------------------------------|-------------------|----------------|------------|
| C1      | 9       | M      | Atopy                        | —                 | 0.40           | 43.80      |
| C2      | 13      | M      | Allergic rhinoconjunctivitis | Grass             | 4.15           | 3225.00    |
| C3      | 17      | M      | Diabetes mellitus            | —                 | 27.73          | 123.00     |
| C4      | 11      | M      | Atopy                        | HDM               | 2.80           | 1673.00    |
| C5      | 4       | F      | Bronchitis                   | —                 | 2.08           | 65.60      |
| C6      | 9       | M      | Atopy                        | —                 | 2.30           | 111.00     |
| C7      | 20      | M      | Diabetes mellitus            | —                 | 4.83           | 60.50      |
| C8      | 8       | M      | Obstructive bronchitis       | —                 | 2.58           | 364.00     |
| C9      | 16      | F      | Allergic asthma              | Cat               | 1.55           | 45.40      |
| C10     | 15      | M      | Diabetes mellitus            | —                 | 1.60           | 21.80      |
| C11     | 17      | M      | Diabetes mellitus            | —                 | 1.15           | 128.00     |
| C12     | 14      | F      | Diabetes mellitus            | —                 | 2.08           | 54.80      |
| Mean    |         |        |                              |                   | 4.44           | 493.0      |
| SD      |         |        |                              |                   | 7.12           | 934.3      |

Atopy was described as allergen-specific IgE sensitization to 1 or more allergen without clear allergic symptoms.  
*HDM*, House dust mite; *SD*, standard deviation; *sFceRI*, soluble FceRI.



**TABLE E3.** Clinical characteristics of follow-up on cancer cohort

| Patient | DS at consent | Total no. of DS | Reaction during further DS | No. of reactions | No. of DS | Biomarker (ng/mL) |                               | Reaction phenotype/grade of reaction | Step of DS | Reason stop of DS                     | Cancer status |
|---------|---------------|-----------------|----------------------------|------------------|-----------|-------------------|-------------------------------|--------------------------------------|------------|---------------------------------------|---------------|
|         |               |                 |                            |                  |           | Tryptase          | IL-6                          |                                      |            |                                       |               |
| 1       | 3             | 8               | Y                          | 6                | 1         | 27.30             |                               | Type I/Grade 2                       | 12, 16     | Change of treatment                   | Ongoing       |
|         |               |                 |                            |                  | 2         |                   | Type I/Grade 3 (not finished) | 11, 16                               |            |                                       |               |
|         |               |                 |                            |                  | 3         | 6.90              | Type I/Grade 1                | 11, 15                               |            |                                       |               |
|         |               |                 |                            |                  | 4         |                   | Type I/Grade 1                | 12, 15                               |            |                                       |               |
|         |               |                 |                            |                  | 6         | 6.00              | Type I/Grade 1                | 12, 16                               |            |                                       |               |
|         |               |                 |                            |                  | 7         |                   | Type I/Grade 1                | 12                                   |            |                                       |               |
|         |               |                 |                            |                  | 2         | 8                 | 14                            | N                                    |            |                                       |               |
|         |               |                 |                            |                  |           |                   |                               |                                      |            |                                       |               |
| 3       | 4             | 7               | N                          |                  |           |                   |                               |                                      |            | Side effects from drugs               | Deceased      |
| 4       | 1             | 11              | N                          |                  |           |                   |                               |                                      |            | Change of treatment                   | Deceased      |
| 5       | 10            | 11              | N                          |                  |           |                   |                               |                                      |            | Change of treatment                   | Unclear       |
| 6       | 1             | 12              | Y                          | 9                | 1         |                   |                               | Type I/Grade 1                       | 16         | Change of treatment                   | Deceased      |
|         |               |                 |                            |                  | 2         |                   | Type I/Grade 1                | 12                                   |            |                                       |               |
|         |               |                 |                            |                  | 3         |                   | Delayed                       |                                      |            |                                       |               |
|         |               |                 |                            |                  | 4         |                   | Delayed                       |                                      |            |                                       |               |
|         |               |                 |                            |                  | 5         |                   | Delayed                       |                                      |            |                                       |               |
|         |               |                 |                            |                  | 6         |                   | Delayed                       |                                      |            |                                       |               |
|         |               |                 |                            |                  | 7         |                   | Delayed                       |                                      |            |                                       |               |
|         |               |                 |                            |                  | 8         |                   | Delayed                       |                                      |            |                                       |               |
|         |               |                 |                            |                  | 9         |                   | Delayed                       |                                      |            |                                       |               |
| 7       | 6             | 8               | N                          |                  |           |                   |                               |                                      |            | Change of treatment                   | Deceased      |
| 8       | 1             | 6               | Y                          | 1                | 2         |                   |                               | Type I/Grade 1                       | 12         | Change of treatment                   | Deceased      |
| 9*      | 15            | 20              | N                          |                  |           |                   |                               |                                      |            | Change of treatment                   | Ongoing       |
| 10*     | 5             | 7               | N                          |                  |           |                   |                               |                                      |            | Ongoing                               | Ongoing       |
| 11*     | 4             | 12              | N                          |                  |           |                   |                               |                                      |            | Clinical trial                        | Deceased      |
| 12      | 12            | 16              | N                          |                  |           |                   |                               |                                      |            | Change of treatment                   | ?             |
| 13*     | 1             | 9               | N                          |                  |           |                   |                               |                                      |            | Changed due to intolerance neuropathy | Ongoing       |
| 14*     | 3             | 21              | Y                          | 4                | 13        | 3.20              | 36.00                         | CRR/Grade 2                          | 12         | Change of treatment                   | Deceased      |
|         |               |                 |                            |                  | 14        |                   |                               | CRR/Grade 3                          | 12         |                                       |               |
|         |               |                 |                            |                  | 15        |                   | 13.90                         | CRR/Grade 1                          | 12         |                                       |               |
|         |               |                 |                            |                  | 16        |                   | 4.20                          | CRR/Grade 1                          | 12         |                                       |               |

?, Unknown; CRR, cytokine release reaction; DS, desensitization; N, no; Y, yes.

\*Patients with soluble FcεRI titers above 2 ng/mL.

## REFERENCES

- Dombrowicz D, Brini AT, Flamand V, Hicks E, Snouwaert JN, Kinet JP, et al. Anaphylaxis mediated through a humanized high affinity IgE receptor. *J Immunol* 1996;157:1645-51.
- Morales AR, Shah N, Castells M. Antigen-IgE desensitization in signal transducer and activator of transcription 6-deficient mast cells by suboptimal doses of antigen. *Ann Allergy Asthma Immunol* 2005;94:575-80.
- Sancho-Serra Mdel C, Simarro M, Castells M. Rapid IgE desensitization is antigen specific and impairs early and late mast cell responses targeting FcεRI internalization. *Eur J Immunol* 2011;41:1004-13.
- Monino-Romero S, Erkert L, Schmidthaler K, Diesner SC, Sallis BF, Pennington L, et al. The soluble isoform of human FcεRI is an endogenous inhibitor of IgE-mediated mast cell responses. *Allergy* 2019;74:236-45.
- Monino-Romero S, Lexmond WS, Singer J, Bannert C, Amoah AS, Yazdanbakhsh M, et al. Soluble FcεRI: a biomarker for IgE-mediated diseases. *Allergy* 2019;74:1381-4.
- Castells M. Drug hypersensitivity and anaphylaxis in cancer and chronic inflammatory diseases: the role of desensitizations. *Front Immunol* 2017;8:1472.
- Caiado J, Venemalm L, Pereira-Santos MC, Costa L, Barbosa MP, Castells M. Carboplatin-, oxaliplatin-, and cisplatin-specific IgE: cross-reactivity and value

- in the diagnosis of carboplatin and oxaliplatin allergy. *J Allergy Clin Immunol Pract* 2013;1:494-500.
- E8. de Las Vecillas Sanchez L, Alenazy LA, Garcia-Neuer M, Castells MC. Drug hypersensitivity and desensitizations: mechanisms and new approaches. *Int J Mol Sci* 2017;18:E1316.
- E9. Jimenez-Rodriguez TW, Garcia-Neuer M, Alenazy LA, Castells M. Anaphylaxis in the 21st century: phenotypes, endotypes, and biomarkers. *J Asthma Allergy* 2018;11:121-42.
- E10. Sloane D, Govindarajulu U, Harrow-Mortelliti J, Barry W, Hsu FI, Hong D, et al. Safety, costs, and efficacy of rapid drug desensitizations to chemotherapy and monoclonal antibodies. *J Allergy Clin Immunol Pract* 2016;4:497-504.
- E11. Picard M, Galvao VR. Current knowledge and management of hypersensitivity reactions to monoclonal antibodies. *J Allergy Clin Immunol Pract* 2017;5:600-9.
- E12. Isabwe GAC, Garcia Neuer M, de Las Vecillas Sanchez L, Lynch DM, Marquis K, Castells M. Hypersensitivity reactions to therapeutic monoclonal antibodies: phenotypes and endotypes. *J Allergy Clin Immunol* 2018;142:159-170.e2.
- E13. Brennan PJ, Rodriguez Bouza T, Hsu FI, Sloane DE, Castells MC. Hypersensitivity reactions to mAbs: 105 desensitizations in 23 patients, from evaluation to treatment. *J Allergy Clin Immunol* 2009;124:1259-66.
- E14. Muraro A, Lemanske RF Jr, Castells M, Torres MJ, Khan D, Simon HU, et al. Precision medicine in allergic disease—food allergy, drug allergy, and anaphylaxis—PRACTALL document of the European Academy of Allergy and Clinical Immunology and the American Academy of Allergy, Asthma and Immunology. *Allergy* 2017;72:1006-21.
